# Supplementary material for: Anti-inflammatory components isolated from Atractylodes macrocephala in LPS-induced RAW264.7 macrophages and BV2 microglia
Source: Research Square preprint supplement (doi:10.21203/rs.3.rs-429158/v1), 2021-04-22
Supplement: Supplementary file 1 [file f56aef6e3b8437b16d603fc6.docx]

**Supplementary Materials**

**Anti-inflammatory components isolated from *Atractylodes macrocephala* in LPS-induced RAW264.7 macrophages and BV2 microglia**

Hong-Guang Jin1,2,a, Kwan-Woo Kim1,3,a, Jing Li1,4,a, Dae Young Lee3, Dahye Yoon3, Jin Tae Jeong3, Geum-Soog Kim3, Hyuncheol Oh1, Ren-Bo An5,*, Youn-Chul Kim1,*

*1Institute of Pharmaceutical Research and Development, College of Pharmacy, Wonkwang University, Iksan 54538, Republic of Korea*

*2School of Pharmacy and Life Sciences, Jiujiang University, Jiujiang 332005, Jiangxi, China*

*3Deparment of Herbal Crop Research, National Institute of Horticultural and Herbal Science, RDA, Eumseong, 27709, Republic of Korea*

*4Deparment of Pharmacy, Jiujiang University Hospital, Jiujiang 332000, Jiangxi, China*

*5College of Pharmacy, Yanbian University, Yanji, Jilin 133002, China*

a.Hong-Quang Jin, Kwan-Woo Kim, and Jing Li contributed equally to this work.

**Corresponding authors**

Ren-Bo An: College of Pharmacy, Yanbian University, Yanji, Jilin 133002, China, E-mail: [anrb@ybu.edu.cn](mailto:anrb@ybu.edu.cn);

Youn-Chul Kim: Institute of Pharmaceutical Research and Development, College of Pharmacy, Wonkwang University, Iksan 54538, Republic of Korea, E-mail: [yckim@wku.ac.kr](mailto:yckim@wku.ac.kr)

**Spectroscopic data of compounds 1 and 5**

Compound **1** (**9α-hydroxyatractylenolide)** - 1H-NMR (400 MHz, CDCl3) δ: 4.98 (1H, d, *J* = 2.0 Hz, H-8β), 4.88 (1H, d, *J* = 1.6 Hz, H-15b), 4.60 (1H, d, *J* = 1.6 Hz, H-15a), 3.88 (1H, d, *J* = 3.6 Hz, H-9β), 2.67 (1H, dd, *J* = 12.8, 3.2 Hz, H-6α), 2.38 (1H, m, H-5α), 2.35 (1H, m, H-3β), 2.31 (1H, m, H-6β), 2.06 (1H, dt, *J* = 13.6, 4.4 Hz, H-1α), 1.95 (1H, m, H-3α), 1.83 (3H, t, *J* = 1.6 Hz, H-13), 1.60 (2H, m, H-2), 1.33 (H, m, H-1β), 0.89 (3H, s, H-14); 13C-NMR (100 MHz, CDCl3) δ: 175.1 (C-12), 159.1 (C-7), 148.9 (C-4), 121.9 (C-11), 107.3 (C-15), 79.9 (C-8), 75.4 (C-9), 42.2 (C-5), 41.0 (C-10), 36.3 (C-3), 34.6 (C-1), 25.6 (C-6), 18.9 (C-2), 15.7 (C-14), 8.4 (C-13).

Compound **5** (**atractylenolide II**) - 1H-NMR (400 MHz, CDCl3) δ: 4.83 (1H, d, *J* = 1.2 Hz, H-15b), 4.80 (1H, t, *J* = 6.4 Hz, H-8), 4.57 (1H, d, *J* = 1.2 Hz, H-15a), 2.68 (1H, dd, *J* = 13.6, 3.6 Hz, H -6α), 2.23-2.36 (3H, m, H-3β, 6β, 9β), 1.94 (1H, td, *J* = 13.2, 6.0 Hz, H-3α), 1.80 (1H, m, H-5α), 1.78 (3H, d, *J* = 1.6 Hz, H-13), 1.52-1.62 (3H, m, H-1β, 2α, 2β), 1.27 (1H, m, H-1α), 1.09 (1H, t, *J* = 12.0 Hz, H-9α), 0.86 (3H, s, H-14);13C-NMR (100 MHz, CDCl3) δ: 174.8 (C-12), 162.6 (C-7), 148.5 (C-4), 120.2 (C-11), 107.0 (C-15), 78.1 (C-8), 50.0 (C-5), 47.6 (C-9), 40.9 (C-1), 37.1 (C-10), 36.3 (C-3), 25.8 (C-6), 22.4 (C-2), 16.5 (C-14), 8.3 (C-13).

**Fig. S1.** 1H-NMR spectrum of compound **1** in CDCl3

**Fig. S2.** 13C-NMR spectrum of compound **1** in CDCl3

**Fig. S3.** HMBC spectrum of compound **1** in CDCl3

**Fig. S4.** NOESY spectrum of compound **1** in CDCl3

**
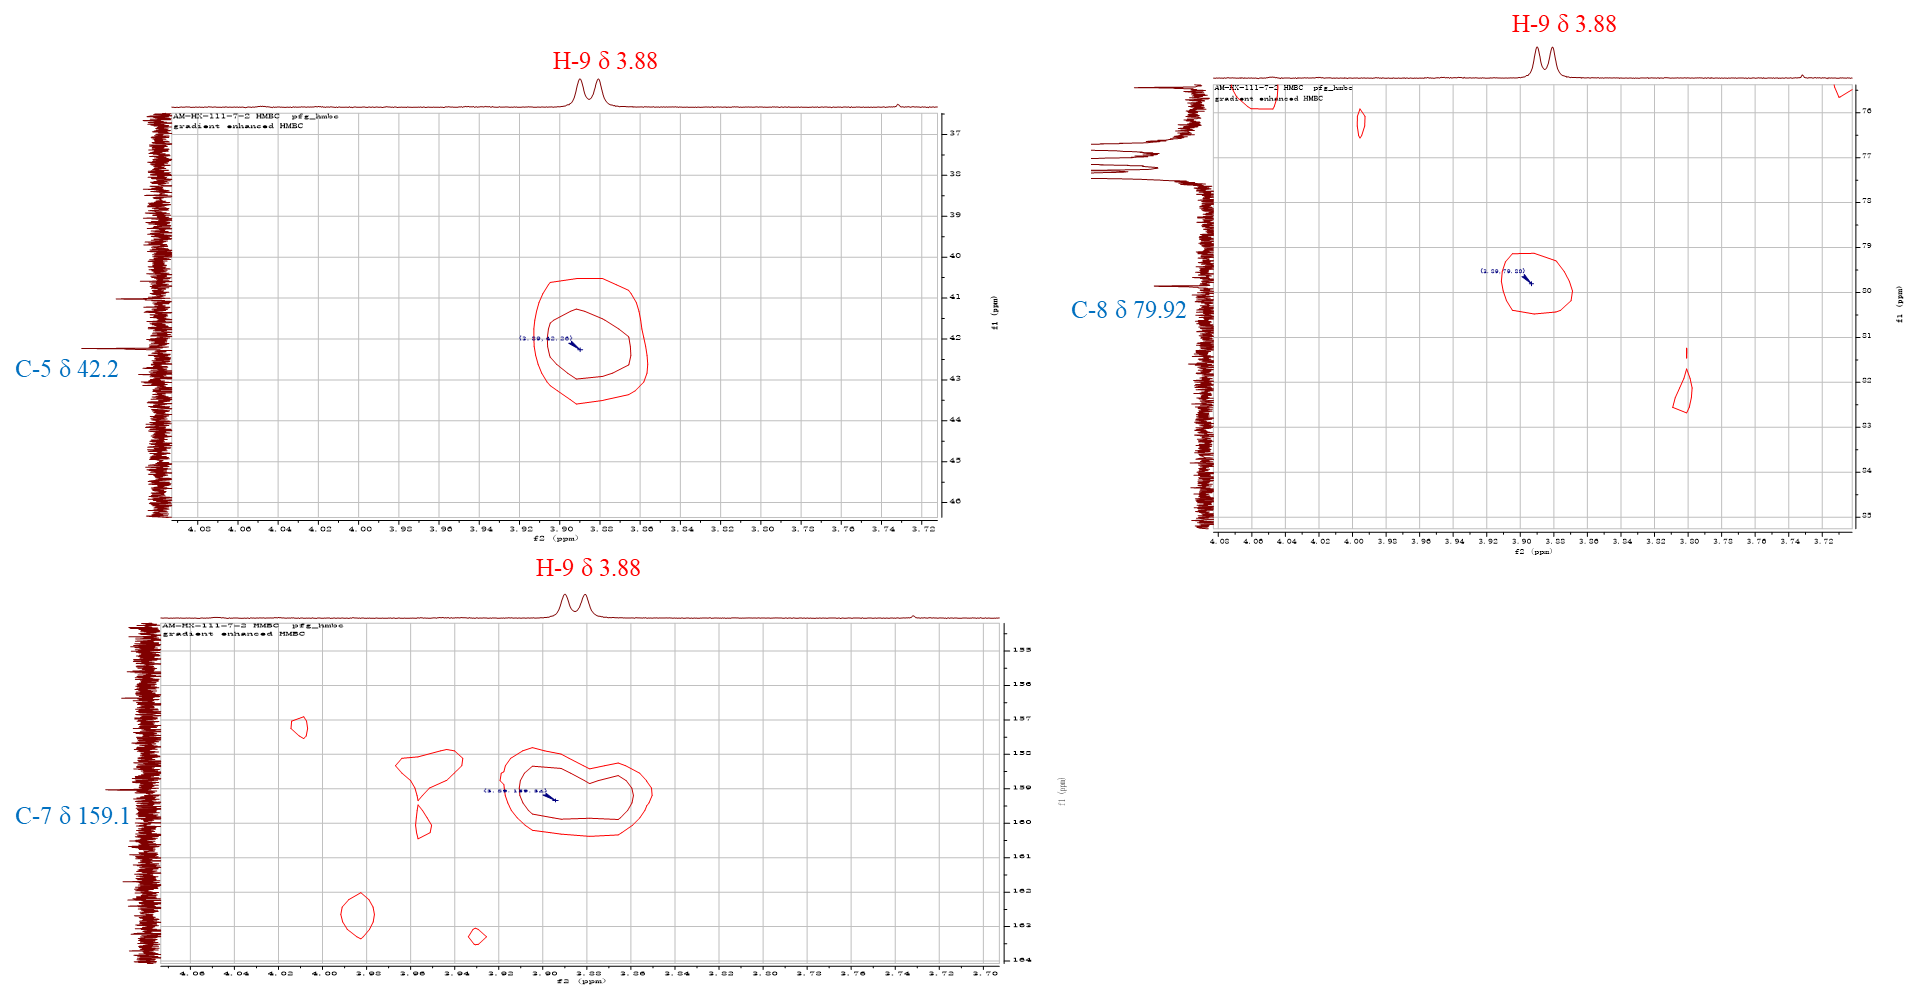
**

**Fig. S5.** The key HMBC correlation of compound **1**

**
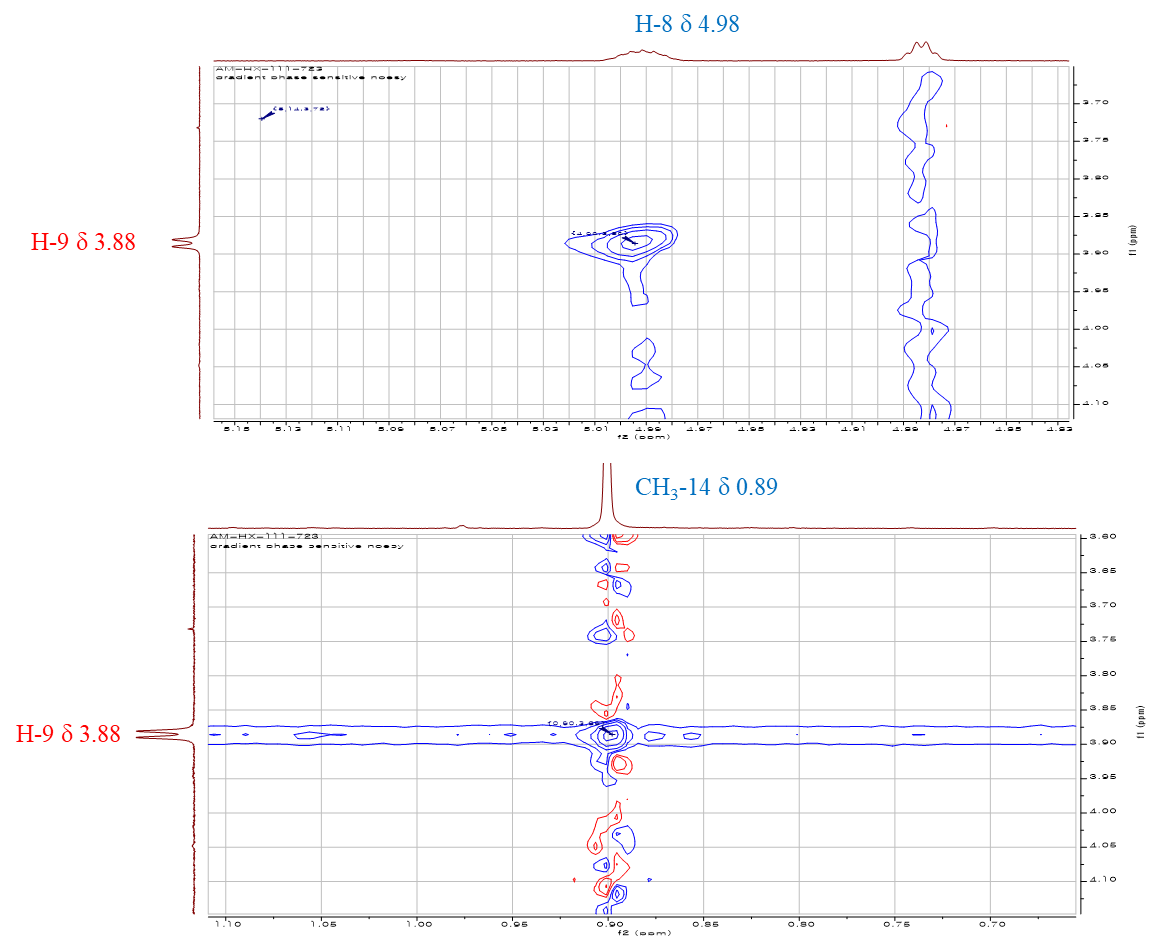
**

**Fig. S6.** The key NOESY correlation of compound **1**
